# Supplementary material for: Differential Proteomic Analysis of Mammalian Tissues Using SILAM
Source: PLoS One. 2011 Jan 20;6(1):e16039. doi: 10.1371/journal.pone.0016039 (PMC3024400; doi:10.1371/journal.pone.0016039)
Supplement: Table S4 — Quantified unmodified proteins common between liver and brain tissue with their GO annotations. (XLSX) [file pone.0016039.s004.xlsx]

## Sheet: Sheet1
		14N Brain/15N Liver			14N Liver/15N Liver					GO ontology
IPI accession	Average	Stdev	Peptides	Average	Stdev	Peptides	Brain/Liver	Protein Description	Localization	Molecular	Biological
IPI00189313	0.15	NA	1	1.1	0.07	2	0.136364	9 kDa protein	nucleosome; nucleus; chromosome	DNA binding	nucleosome assembly; chromosome organization and biogenesis (sensu Eukaryota)
IPI00205274	0.36	0.01	2	0.97	0.08	5	0.371134	Myb-binding protein 1A	nucleus; nucleolus; cytoplasm; NLS-dependent protein nuclear import complex	transcriptional repressor activity; transcriptional activator activity; protein binding	regulation of transcription, DNA-dependent; negative regulation of transcription; electron transport; nucleocytoplasmic transport
IPI00208091	0.42	NA	1	1.12	NA	1	0.375	Fibrillarin	dense fibrillar component; ribonucleoprotein complex; nucleolus; Cajal body	RNA binding; snoRNA binding; RNA binding	snoRNA metabolism; rRNA processing; rRNA processing
IPI00551806	0.84	0.05	3	2.17	0.33	9	0.387097	N-acylneuraminate cytidylyltransferase	nucleus	N-acylneuraminate cytidylyltransferase activity; transferase activity; magnesium ion binding; 3-deoxy-manno-octulosonate-8-phosphatase activity	none
IPI00202484	0.3	0.23	2	0.74	0.07	4	0.405405	Arginine/serine-rich splicing factor 10	nucleus	RNA binding; RNA binding; nucleic acid binding	response to reactive oxygen species; nuclear mRNA splicing, via spliceosome; RNA splicing
IPI00369950	0.26	0.02	2	0.61	0.08	10	0.42623	PREDICTED: similar to vascular endothelial zinc finger 1	nucleus	specific RNA polymerase II transcription factor activity	endothelial cell development; angiogenesis; regulation of transcription from RNA polymerase II promoter; cellular defense response
IPI00230830	0.51	NA	1	1.15	0.07	8	0.443478	Eukaryotic translation initiation factor 2 subunit 1	nucleus; cytoplasm; polysome	translation initiation factor activity; protein binding; translation initiation factor activity	regulation of translation; protein biosynthesis; regulation of translation initiation in response to stress
IPI00357923	0.71	NA	1	1.49	0.18	6	0.47651	Nucleolar protein 5A	nucleolus	RNA binding	rRNA processing
IPI00364603	0.58	NA	1	1.18	0.1	2	0.491525	Ewsr1 protein	nucleus	DNA binding; RNA binding	none
IPI00231827	0.54	0.02	2	1.07	0.05	5	0.504673	Nucleolin	nucleolus	none	none
IPI00231507	0.73	0.27	12	1.42	0.4	17	0.514085	Splice Isoform 1 of Core histone macro-H2A.1	nucleosome; chromosome; nucleus; condensed chromosome; chromosome; nucleosome; centrosome; Barr body; nucleosome	chromatin binding; DNA binding; DNA binding	chromosome organization and biogenesis (sensu Eukaryota); nucleosome assembly; dosage compensation; nucleosome assembly
IPI00361832	0.74	NA	1	1.41	NA	1	0.524823	PREDICTED: similar to Putative pre-mRNA splicing factor RNA helicase	minor (U12-dependent) spliceosome complex; nucleus	ATPase activity; RNA helicase activity	RNA splicing
IPI00361887	0.56	0.05	3	1.05	0.05	12	0.533333	PREDICTED: similar to H2A histone family, member V isoform 1	nucleosome; nucleus; chromosome	DNA binding	nucleosome assembly; chromosome organization and biogenesis (sensu Eukaryota)
IPI00209148	0.52	0.05	2	0.95	0.25	7	0.547368	Splice Isoform 1 of Heterogeneous nuclear ribonucleoprotein M	nucleus; ribonucleoprotein complex; membrane fraction; nucleus; plasma membrane; integral to plasma membrane; spliceosome complex; integral to plasma membrane	RNA binding; antigen binding; RNA binding; RNA binding; transmembrane receptor activity; RNA binding	nuclear mRNA splicing, via spliceosome
IPI00361887	0.58	0.1	6	1.05	0.05	12	0.552381	PREDICTED: similar to H2A histone family, member V isoform 1	nucleosome; nucleus; chromosome	DNA binding	nucleosome assembly; chromosome organization and biogenesis (sensu Eukaryota)
IPI00231475	1.13	0.2	7	2	0.45	9	0.565	Histone H3.3	chromosome; nucleosome	DNA binding	nucleosome assembly; chromosome organization and biogenesis (sensu Eukaryota)
IPI00454367	0.83	0.14	8	1.44	0.21	28	0.576389	Hypothetical protein	nucleus; intermediate filament; nucleus; lamin filament; nuclear inner membrane; lamin filament	protein binding	spermatogenesis; nuclear membrane organization and biogenesis
IPI00213613	0.84	0.12	10	1.43	0.2	31	0.587413	lamin A isoform C2	nucleus; intermediate filament; nucleus; lamin filament; nuclear inner membrane; lamin filament	protein binding	spermatogenesis; nuclear membrane organization and biogenesis
IPI00201060	0.83	0.11	18	1.41	0.26	37	0.588652	Splice Isoform Lamin A of Lamin-A	nucleus; intermediate filament; nucleus; lamin filament; nuclear inner membrane; lamin filament	protein binding	spermatogenesis; nuclear membrane organization and biogenesis
IPI00392794	0.48	0.06	5	0.79	0.17	8	0.607595	27 kDa protein	nucleus	nucleic acid binding; protein binding	RNA splicing
IPI00390239	0.43	NA	1	0.7	0.11	6	0.614286	Ptbp1 protein	nucleus; nucleoplasm; nucleolus; heterogeneous nuclear ribonucleoprotein complex	single-stranded DNA binding; RNA binding; endonuclease activity; protein binding; protein binding; poly-pyrimidine tract binding	nuclear mRNA splicing, via spliceosome; RNA splicing; RNA splicing
IPI00231780	1.13	0	2	1.74	0.17	5	0.649425	Histone H1.0	chromosome; nucleus	DNA binding; DNA binding	none
IPI00464732	0.55	0.01	2	0.78	0	2	0.705128	RNA-binding protein with serine-rich domain 1	nucleus	nucleic acid binding	mRNA catabolism, nonsense-mediated decay; nuclear mRNA splicing, via spliceosome
IPI00215107	0.45	NA	1	0.63	0.04	4	0.714286	40S ribosomal protein SA	nuclear euchromatin	laminin receptor activity	heart development
IPI00231974	0.68	0.14	7	0.91	0.33	5	0.747253	Histone H2A type 4	chromosome	DNA binding	S-phase regulated histone modification
IPI00207659	0.93	0.01	2	1.16	0.18	6	0.801724	Barrier-to-autointegration factor	nucleus; chromosome	DNA binding	DNA integration; regulation of viral life cycle; provirus integration; response to virus
IPI00555302	0.67	0.11	3	0.76	0.13	6	0.881579	RNA-binding region	nucleus; nucleoplasm	protein binding; transcription coactivator activity	transcription
IPI00475453	0.93	NA	1	1.03	NA	1	0.902913	Ddx17 protein	nucleus	RNA binding; RNA helicase activity; RNA-dependent ATPase activity	RNA processing
IPI00464718	1.04	0.06	5	0.91	0.82	9	1.14286	Ddx5	nucleus	transcription cofactor activity; RNA helicase activity; protein binding	positive regulation of transcription
IPI00400578	2.02	0.38	2	1.64	0.42	6	1.23171	Heterochromatin protein 1, binding protein 3	nucleus; nucleosome	DNA binding	nucleosome assembly
IPI00210357	0.97	0.33	3	0.77	0.07	10	1.25974	heterogeneous nuclear ribonucleoprotein F	nucleus; nucleus	TATA-binding protein binding; nucleic acid binding; RNA binding	RNA processing
IPI00212796	1.6	NA	1	1.25	0.24	5	1.28	GTP-binding nuclear protein Ran	nucleus	nucleotide binding; GTPase activity; protein binding; GTP binding	spermatid development; protein import into nucleus; microtubule cytoskeleton organization and biogenesis; protein import into nucleus; protein export from nucleus; nucleocytoplasmic transport; intracellular protein transport; small GTPase mediated signal
IPI00212219	1.19	NA	1	0.81	0.06	3	1.46914	Lupus La protein homolog	nucleus	none	tRNA processing
IPI00203088	1.18	0.4	5	0.76	0.14	9	1.55263	51 kDa protein	nucleoplasm; nucleus; heterogeneous nuclear ribonucleoprotein complex	RNA binding; protein binding; poly(U) binding	RNA processing; RNA processing
IPI00364132	1.37	0.73	5	0.83	0.11	5	1.6506	PREDICTED: similar to TAF15 RNA polymerase II, TATA box binding protein (TBP)-associated factor	transcription factor TFIID complex	nucleic acid binding; single-stranded DNA binding; RNA polymerase II transcription factor activity; single-stranded RNA binding	none
IPI00208205	2.51	0.78	16	1.33	0.41	19	1.88722	Heat shock cognate 71 kDa protein	nucleus; cell surface; intracellular	nucleotide binding; unfolded protein binding; ATPase activity, coupled; unfolded protein binding; protein binding; ATPase activity, coupled	protein folding; response to unfolded protein; protein folding; regulation of progression through cell cycle; chaperone cofactor-dependent protein folding; response to unfolded protein; protein folding; response to unfolded protein
IPI00568555	2.12	NA	1	0.91	0.1	2	2.32967	155 kDa protein	nucleus	transporter activity	transport
IPI00191216	2.34	0.82	5	0.83	0.09	8	2.81928	45 kDa protein	nucleus	protein binding; transcription factor activity; microtubule binding	transcription from RNA polymerase II promoter; mitosis
IPI00559910	2.68	0.5	6	0.92	0.17	6	2.91304	Heterogeneous nuclear ribonucleoprotein G	nucleus; ribonucleoprotein complex; nucleus	RNA binding	none
IPI00187860	2.97	1	4	0.99	0.16	5	3	Heterogeneous nuclear ribonucleoprotein C	nucleus; ribonucleoprotein complex; nucleus; pronucleus; spliceosome complex	DNA binding; RNA binding; identical protein binding; RNA binding	RNA splicing; nuclear mRNA splicing, via spliceosome; RNA splicing
IPI00205097	3.33	NA	1	1.02	0.17	6	3.26471	KH domain-containing, RNA-binding, signal transduction-associated protein 1	nucleus; cytoplasm; nucleus; nucleus; membrane; membrane; nucleus; membrane	protein binding; SH3/SH2 adaptor activity; protein binding; transcriptional repressor activity; RNA binding; transcriptional repressor activity; RNA binding; protein binding; transporter activity; RNA binding; SH3/SH2 adaptor activity; protein binding; DN	cell surface receptor linked signal transduction; transcription; regulation of transcription, DNA-dependent; cell cycle; regulation of RNA export from nucleus; negative regulation of transcription; G2/M transition of mitotic cell cycle; negative regulatio
IPI00358211	3.14	0.58	23	0.92	0.06	15	3.41304	PREDICTED: similar to Heterogeneous nuclear ribonucleoproteins A2/B1	spliceosome complex; nucleus; heterogeneous nuclear ribonucleoprotein complex	protein binding; RNA binding	nuclear mRNA splicing, via spliceosome
IPI00364061	3.17	0.52	7	0.87	0.14	9	3.64368	Hnrpl protein	pronucleus; nucleoplasm; heterogeneous nuclear ribonucleoprotein complex	RNA binding	none
IPI00230941	3.39	1.35	13	0.92	0.44	14	3.68478	Vimentin	nucleus; cytoplasm; cytoplasm; type III intermediate filament; type III intermediate filament; cytoplasm; intermediate filament; cytoskeleton	structural constituent of cytoskeleton; protein binding; structural molecule activity; structural molecule activity; structural constituent of cytoskeleton; protein binding	intermediate filament-based process; cell motility
IPI00362587	3.18	2.72	2	0.82	0.05	4	3.87805	53 kDa protein	cytoplasm; nucleus; nucleus	transcriptional activator activity; protein binding; RNA binding	positive regulation of transcription from RNA polymerase II promoter
IPI00364061	3.79	NA	1	0.87	0.14	9	4.35632	Hnrpl protein	pronucleus; nucleoplasm; heterogeneous nuclear ribonucleoprotein complex	RNA binding	none
IPI00421560	5.99	4.43	4	1.25	0.25	2	4.792	alpha actinin 4	cytoplasm; cortical cytoskeleton; cytoplasm; nucleus; cytoplasm; protein complex; perinuclear region; pseudopodium	protein N-terminus binding; actin filament binding; protein binding; nucleoside binding; actin filament binding; protein binding; integrin binding; protein homodimerization activity	positive regulation of cell motility; regulation of progression through cell cycle; regulation of apoptosis
IPI00555287	9.3	5.61	14	1.93	0.28	6	4.81865	Non-erythroid spectrin beta	nucleus; plasma membrane	protein binding	common-partner SMAD protein phosphorylation; SMAD protein nuclear translocation
IPI00231383	3.74	1.29	3	0.76	0.05	3	4.92105	Splice Isoform 2 of Heterogeneous nuclear ribonucleoprotein D0	cytosol; nucleus; ribonucleoprotein complex; nucleus; nucleus	RNA binding; mRNA binding; mRNA binding; nucleic acid binding; transcriptional activator activity; RNA binding	mRNA stabilization; regulation of mRNA stability; mRNA catabolism, exonucleolytic; nucleocytoplasmic transport; regulation of transcription, DNA-dependent; RNA processing; RNA catabolism
IPI00555287	9.3	5.61	14	1.83	0.44	18	5.08197	Non-erythroid spectrin beta	nucleus; plasma membrane	protein binding	common-partner SMAD protein phosphorylation; SMAD protein nuclear translocation
IPI00373419	10.13	5.65	13	1.89	0.41	16	5.35979	Non-erythrocyte beta-spectrin	nucleus; plasma membrane	protein binding	common-partner SMAD protein phosphorylation; SMAD protein nuclear translocation
IPI00555287	10.13	5.65	13	1.83	0.44	18	5.53552	Non-erythroid spectrin beta	nucleus; plasma membrane	protein binding	common-partner SMAD protein phosphorylation; SMAD protein nuclear translocation
IPI00391659	4.31	NA	1	0.73	NA	1	5.90411	42 kDa protein	nucleus; viral nucleocapsid; nucleus; heterogeneous nuclear ribonucleoprotein complex	RNA binding; RNA binding	mRNA editing; mRNA transport; mRNA processing
IPI00421560	5.99	4.43	4	0.91	NA	1	6.58242	alpha actinin 4	cytoplasm; cortical cytoskeleton; cytoplasm; nucleus; cytoplasm; protein complex; perinuclear region; pseudopodium	protein N-terminus binding; actin filament binding; protein binding; nucleoside binding; actin filament binding; protein binding; integrin binding; protein homodimerization activity	positive regulation of cell motility; regulation of progression through cell cycle; regulation of apoptosis
IPI00363719	4.59	0.77	2	0.61	0.18	3	7.52459	Heterogeneous nuclear ribonucleoprotein D-like	nucleus	nucleic acid binding	none
